# Supplementary material for: The microbiome in pediatric cystic fibrosis patients: the role of shared environment suggests a window of intervention
Source: PubMed Central journal article supplement (PMC4113139; doi:10.1186/2049-2618-2-14), 2014-04-28
Supplement: 2049-2618-2-14-S1.pdf [file 2049-2618-2-14-S1.pdf]

**Supplemental Table 1: Characteristics of study population by twin/sibling status**

|                                                | MZ twins                       | Siblings                       |
|------------------------------------------------|--------------------------------|--------------------------------|
| Individuals                                    | 8                              | 5                              |
| Female gender                                  | 2 (25%)                        | 0                              |
| Caucasian                                      | 8 (100%)                       | 5 (100%)                       |
| CF genotype                                    |                                |                                |
| $\Delta$ F508 homozygotes                      | 4 (50%)                        | 5 (100%)                       |
| Pancreatic insufficient                        | 8 (100%)                       | 5 (100%)                       |
| Age $\pm$ SD, in yrs (range)                   | 14.25 $\pm$ 2.97 (10.98-18.08) | 13.76 $\pm$ 2.41 (10.29-16.10) |
| MaxFEV <sub>1</sub> CF% ile                    | 0.71 $\pm$ 0.28 (0.191-0.976)  | 0.78 $\pm$ 0.19 (0.58-1.0)     |
| Previous positive <i>P. aeruginosa</i> culture | 8 (100%)                       | 5 (100%)                       |
| Previous positive <i>S. aureus</i> culture     | 8 (100%)                       | 5 (100%)                       |

**Supplemental Table 2: Characteristics of adult study population**

|                                                |                             |
|------------------------------------------------|-----------------------------|
| Individuals                                    | 10                          |
| Female gender                                  | 2 (20%)                     |
| Caucasian                                      | 10 (100%)                   |
| CF genotype                                    |                             |
| $\Delta$ F508 homozygotes                      | 6 (60%)                     |
| Pancreatic insufficient                        | 10 (100%)                   |
| Age $\pm$ SD, in yrs (range)                   | 35.4 $\pm$ 15.3 (20.1-50.7) |
| MaxFEV <sub>1</sub> CF% ile                    | 0.57 $\pm$ 0.21 (0.36-0.78) |
| Previous positive <i>P. aeruginosa</i> culture | 10 (100%)                   |
| Previous positive <i>S. aureus</i> culture     | 10 (100%)                   |
